# Supplementary material
Source: publisher figshare collection journal article supplement (https://sage.figshare.com/ndownloader/files/22090116)
Supplement: Supplementary file 1 [file 22090116]

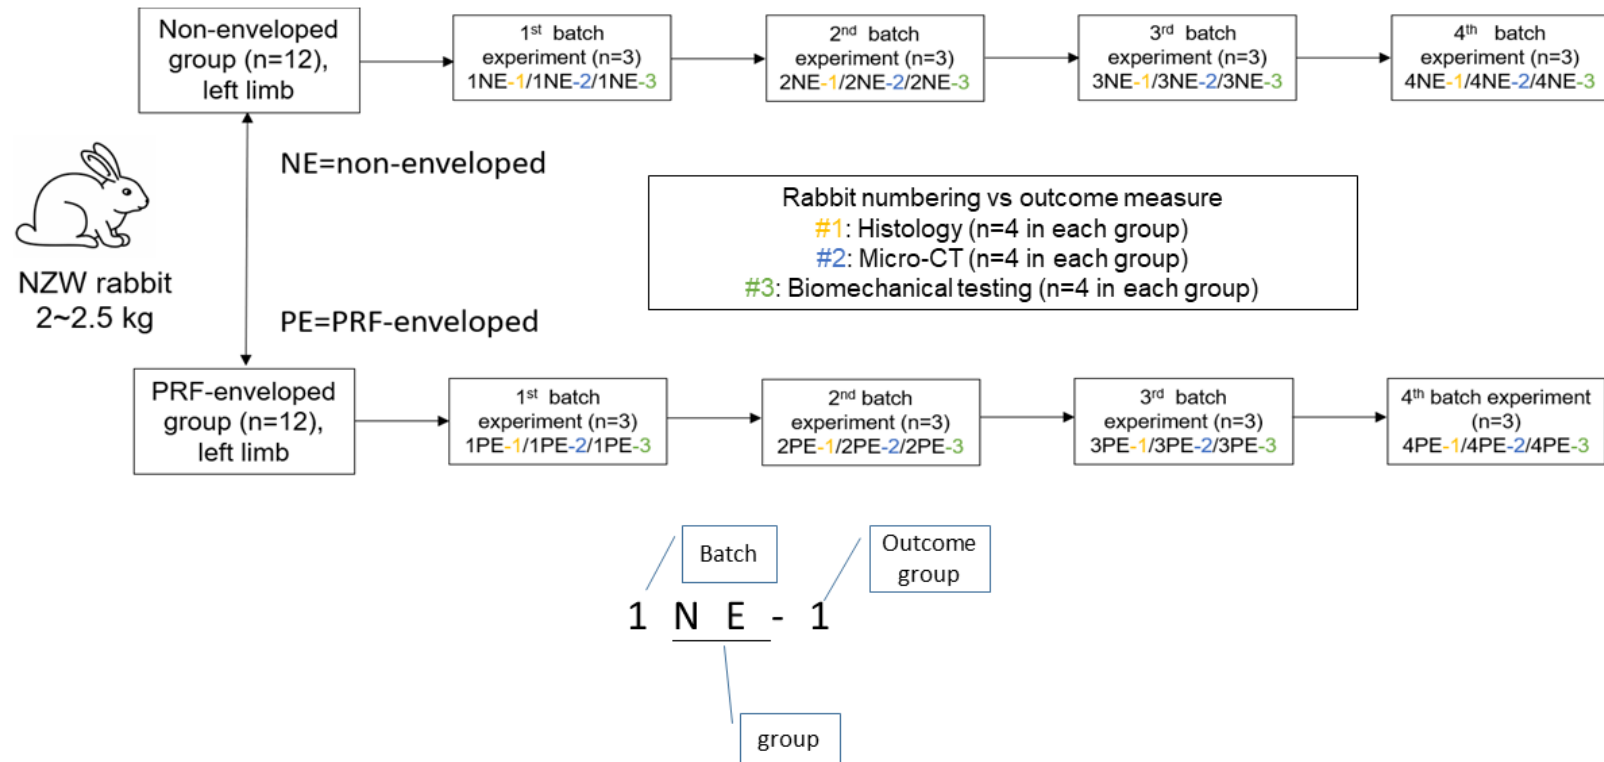

**Appendix Figure A1.** The schematic of the experimental design of animal study. Four batch of rabbits were allocated into non-enveloped (NE) and PRF-enveloped (PE) groups. Each rabbit was labelled individually by its batch, experimental group and outcome analytic measure.
